# Supplementary material
Source: PubMed Central journal article supplement (PMC4751801)
Supplement: JB.00569-15_zjb999093867so1.pdf [file JB.00569-15_zjb999093867so1.pdf]

Supplemental Material

**The Trk potassium transporter is required for RsmB-mediated activation of virulence in the phytopathogen *Pectobacterium wasabiae***

Rita S. Valente, Karina B. Xavier

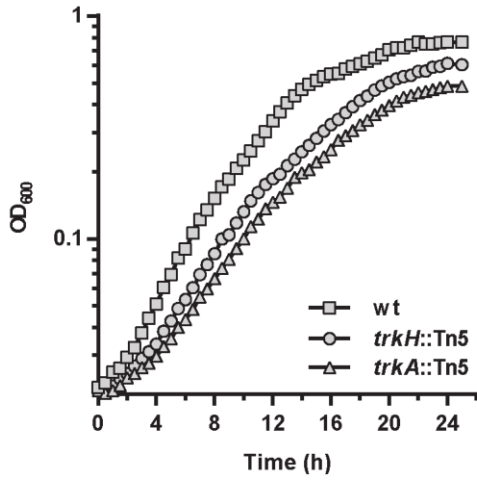

**Fig. S1. Growth of wt and *trk* mutant *P. wasabiae*.** Optical Density at 600 nm (OD<sub>600</sub>) was measured throughout growth of wt (squares), *trkH*::Tn5 (RSV141, circles) and *trkA*::Tn5 (RSV236, triangles) *P. wasabiae* in MM.

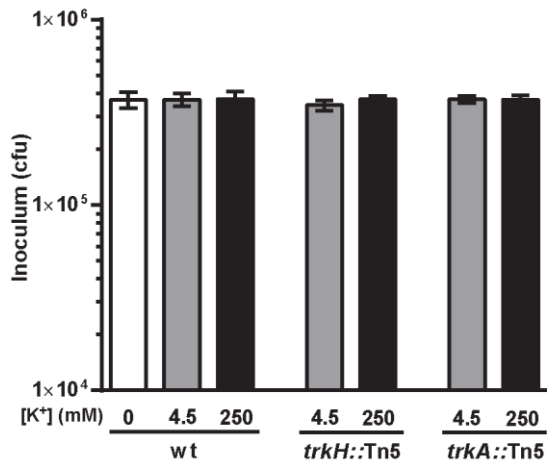

**Fig. S2. Extracellular potassium concentration does not affect inoculum viability.** The inoculum of wt, *trkH::Tn5* and *trkA::Tn5* when re-suspended in potassium-free PBS (0 mM of potassium, white bar), PBS (4.5 mM of potassium, grey bars) or PBS supplemented with potassium at a final concentration of 250 mM (black bars), was quantified by serial dilution and plating of the bacterial suspension before inoculation of potato tubers. Error bars represent SD, n = 3.

**Table S1** – Strains and plasmids used in this study

| Strains and Plasmids | Relevant Genotype                                          | Source           |
|----------------------|------------------------------------------------------------|------------------|
| <i>P. wasabiae</i>   |                                                            |                  |
| SCC3193              | Wild-type                                                  | (14)             |
| RSV206               | SCC3193 carrying pRSV206                                   | This study       |
| RSV470               | $\Delta gacA::str$                                         | This study       |
| RSV503               | RSV470 carrying pRSV206                                    | This study       |
| RSV124               | <i>trkA::Tn5kan</i>                                        | This study       |
| RSV236               | <i>trkA::Tn5kan</i>                                        | This study       |
| RSV302               | RSV236 carrying pRSV206                                    | This study       |
| RSV562               | $\Delta gacA::str$ in RSV236 background carrying pRSV206   | This study       |
| RSV108               | <i>trkH::Tn5kan</i>                                        | This study       |
| RSV154               | <i>trkH::Tn5kan</i>                                        | This study       |
| RSV141               | <i>trkH::Tn5kan</i>                                        | This study       |
| RSV187               | RSV141 carrying pRSV206                                    | This study       |
| RSV713               | RSV206 carrying pOM18                                      | This study       |
| RSV711               | RSV302 carrying pOM18                                      | This study       |
| RSV580               | RSV302 carrying pRSV526                                    | This study       |
| RSV808               | RSV187 carrying pOM18                                      | This study       |
| RSV802               | RSV187 carrying pRSV781                                    | This study       |
| <i>E. coli</i>       |                                                            |                  |
| DH5 $\alpha$         | DH5 $\alpha$                                               | Laboratory stock |
| Plasmids             |                                                            |                  |
| pCMW1                | Promoterless- <i>gfp</i> reporter vector, Kan <sup>r</sup> | (16)             |

---

|         |                                                                                                     |            |
|---------|-----------------------------------------------------------------------------------------------------|------------|
| pUC18   | Cloning vector, Amp <sup>r</sup>                                                                    | (19)       |
| pKD46   | λ Red recombinase expressing vector, Amp <sup>r</sup>                                               | (17)       |
| pKD3    | Vector containing chloramphenicol cassette, Cm <sup>r</sup>                                         | (17)       |
| pKNG101 | Vector containing streptomycin cassette, Str <sup>r</sup>                                           | (20)       |
| pOM18   | Cloning vector, Spec <sup>r</sup>                                                                   | This study |
| pRSV59  | pCMW1 vector with chloramphenicol cassette, cm <sup>r</sup> , kan <sup>r</sup>                      | This study |
| pRSV206 | pRSV59 containing Promoter <sub><i>rsmB</i></sub> - <i>gfp</i> , cm <sup>r</sup> , kan <sup>r</sup> | This study |
| pRSV526 | <i>trkA</i> <sup>+</sup>                                                                            | This study |
| pRSV781 | <i>trkH</i> <sup>+</sup>                                                                            | This study |

---

**Table S2** – Primers used in this study.

| Primers Name         | Sequence                             |
|----------------------|--------------------------------------|
| P0276-pKD3/4(BamHI)  | ACGCGGATCCGTGTAGGCTGGAGCTGCTTC       |
| P0277-pKD3/4(BamHI)  | ACGCGGATCCCATATGAATATCCTCCTTAGT      |
| P0528-rsmB(SphI)     | GAGCATGCTGTCCTGGAAGAATTCGGCACG       |
| P0529-rsmB(SalI)     | CTGTTCGACATCCGAGTGCAGTAACAGTG        |
| P1106-pKNG101(XhoI)  | AGCCTCGAGAGAGTCTTTGTTTTGACGCCAT      |
| P1107-pKNG101(XhoI)  | CTACTCGAGATCCTCTACGCCGGACGCATC       |
| P0918-gacA(SalI)     | GCAGTCGACGACACGACAGGCAGAATCAGA       |
| P0919-gacA(SacI)     | TAGGAGCTCAGAGCGGTTGCGATAGACG         |
| P1097-Del.gacA(XhoI) | CGCCTCGAGAGATAATTCTCCAAAAAAGGG       |
| P1098-Del.gacA(XhoI) | AGGCTCGAGGTGAGTGAGAGTTTCGATGC        |
| P1148-trkA(SalI)     | AGTGTCGACCGTACTCGCTGTCGATATTG        |
| P1149-trkA(SacI)     | CGTGAGCTCTTCTCCTGTTTACGACGCA         |
| P1150-trkA(XhoI)     | GGCCTCGAGTCCGGGAGCTAATTTATTACT       |
| P1151-trkA(XhoI)     | GGCCTCGAGAATAAGCCATGCCGTTTATTG       |
| P1314-trkH(PstI)     | TATCTGCAGGGGTAAACCGATGTTGTCGCA       |
| P1306-trkH(XbaI)     | AGCTCTAGAGGGACTATTCCCGCCAGAAG        |
| P0052-Arb1K          | GGCCACGCGTCGACTAGTACNNNNNNNNNNGATAT  |
| P0053-Arb2K          | GGCCACGCGTCGACTAGTAC                 |
| P0054-Arb6K          | GGCCACGCGTCGACTAGTACNNNNNNNNNNNACGCC |
| P0057-Kan_SP2        | ACCTACAACAAAGCTCTCATCAACC            |
| P0058-Kan_SP1        | TGGCCTGTTGAACAAGTCTG                 |

**Table S3** – Mutants identified in this study

| Mutant | Gene disrupted <sup>a</sup> | Gene name or putative homologue |
|--------|-----------------------------|---------------------------------|
| RSV117 | W5S_0007 <sup>b</sup>       | <i>ascG</i>                     |
| RSV126 | W5S_4216                    | <i>damX</i>                     |
| RSV221 | W5S_4216 <sup>b</sup>       | <i>damX</i>                     |
| RSV109 | W5S_4607                    | <i>expl</i>                     |
| RSV135 | W5S_4607                    | <i>expl</i>                     |
| RSV112 | W5S_4607                    | <i>expl</i>                     |
| RSV101 | W5S_4607                    | <i>expl</i>                     |
| RSV133 | W5S_4607                    | <i>expl</i>                     |
| RSV138 | W5S_4607                    | <i>expl</i>                     |
| RSV107 | W5S_4607                    | <i>expl</i>                     |
| RSV224 | W5S_4088                    | <i>rsgA</i>                     |
| RSV238 | W5S_2585                    | <i>sapC</i>                     |
| RSV124 | W5S_4132                    | <i>trkA</i>                     |
| RSV236 | W5S_4132                    | <i>trkA</i>                     |
| RSV108 | W5S_4400                    | <i>trkH</i>                     |
| RSV154 | W5S_4400                    | <i>trkH</i>                     |
| RSV141 | W5S_4400                    | <i>trkH</i>                     |
| RSV125 | W5S_4168                    | <i>tusB</i>                     |
| RSV168 | W5S_4218                    | <i>aroK<sup>c</sup></i>         |
| RSV241 | W5S_3085 <sup>b</sup>       | <i>cydA<sup>c</sup></i>         |
| RSV231 | W5S_4215                    | <i>dam<sup>c</sup></i>          |
| RSV144 | W5S_2225                    | <i>galU<sup>c</sup></i>         |
| RSV267 | W5S_2225                    | <i>galU<sup>c</sup></i>         |
| RSV240 | W5S_1079                    | <i>hemL<sup>c</sup></i>         |

---

|        |          |                          |
|--------|----------|--------------------------|
| RSV230 | W5S_0715 | <i>pnp</i> <sup>c</sup>  |
| RSV119 | W5S_0715 | <i>pnp</i> <sup>c</sup>  |
| RSV157 | W5S_3391 | <i>recB</i> <sup>c</sup> |
| RSV149 | W5S_2530 | Hypothetical protein     |
| RSV113 | W5S_4091 | Hypothetical protein     |

---

<sup>a</sup> Genes numbered according to SCC3193 complete genome sequence NCBI taxid: 1166160

<sup>b</sup> Transposon inserted upstream of the gene

<sup>c</sup> Gene name according to the *E. coli* putative homologue



**Table S4** – Growth Rates in Minimal Potassium Medium from Fig. S2.

| <b>Strain</b>     | <b>Potassium Concentration</b> |                      |                      |                      |
|-------------------|--------------------------------|----------------------|----------------------|----------------------|
|                   | <b>0.25 mM</b>                 | <b>2.5 mM</b>        | <b>25 mM</b>         | <b>250 mM</b>        |
| wt                | 0.18 h <sup>-1</sup>           | 0.23 h <sup>-1</sup> | 0.20 h <sup>-1</sup> | 0.17 h <sup>-1</sup> |
| <i>trkH</i> ::Tn5 | -                              | 0.18 h <sup>-1</sup> | 0.18 h <sup>-1</sup> | 0.17 h <sup>-1</sup> |
| <i>trkA</i> ::Tn5 | -                              | 0.14 h <sup>-1</sup> | 0.15 h <sup>-1</sup> | 0.14 h <sup>-1</sup> |
